# Supplementary material for: Pantothenate and L-Carnitine Supplementation Improves Pathological Alterations in Cellular Models of KAT6A Syndrome
Source: Genes (Basel). 2022 Dec 6;13(12):2300. doi: 10.3390/genes13122300 (PMC9778406; doi:10.3390/genes13122300)
Supplement: Supplementary file 1 [file genes-13-02300-s001.zip › RNAseq-data.xlsx]

## Sheet: Principal
ENSEMBL	Protein	CT1	CT2	CT3	CPT1	CPT2	CPT3	K1	K2	K3	KT1	KT2	KT3	Media CT	Media CPT	Media K	Media KT	Media CT Nr	Media CPT Nr	Media K Nr	Media KT Nr	Error CT	Error CPT	Error K	Error KT
ENSG00000083168	KAT6A	1035.44	1053.1	1034	1034.57	1015.77	1078.62	955.888	872.634	913.513	985.446	1023.97	985.216	1040.84	1042.98	914.012	998.209	1	1.00206	0.878144	0.959038	0.0102223	0.0309943	0.0399952	0.0214305
ENSG00000096717	SIRT1	375.923	350.21	377.605	359.737	382.88	347.806	414.865	427.115	426.6	557.417	508.306	545.399	367.913	363.474	422.86	537.041	1	0.987937	1.14935	1.4597	0.0417326	0.0484704	0.0188321	0.0695818
ENSG00000142082	SIRT3	333.525	359.274	329.4	364.03	317.318	315.959	336.438	355.004	324.041	307.959	277.941	284.395	340.733	332.436	338.495	290.099	1	0.975648	0.99343	0.851395	0.0475119	0.0803257	0.0457354	0.0463731
ENSG00000105835	NAMPT1	3700.81	3544.95	3544.67	3828.32	3697.67	3627.24	236.416	227.425	231.302	676.627	708.624	662.358	3596.81	3717.75	231.714	682.537	1	1.03362	0.0644222	0.189762	0.0250413	0.0283668	0.00125386	0.00658704
ENSG00000198695	Mt-ND6	10922.5	10706.5	10593.8	10683.9	11031.8	11071.1	19278.1	19566.3	18390.7	8509.17	8508.5	8577.42	10741	10929	19078.4	8531.69	1	1.0175	1.77623	0.794315	0.0155486	0.0198418	0.0570452	0.00368669
ENSG00000139180	NDUFA9	126.25	120.307	118.905	122.774	131.997	116.494	95.4074	97.1341	71.4067	129.574	118.924	103.915	121.821	123.755	87.9827	117.471	1	1.01588	0.72223	0.964294	0.0320062	0.0640121	0.118052	0.105821
ENSG00000125779	PANK2	615.232	658.395	612.202	567.508	650.371	647.004	491.229	502.553	468.06	515.473	509.558	535.346	628.61	621.628	487.28	520.126	1	0.988893	0.775172	0.827423	0.0411052	0.0746074	0.0279702	0.0214901
ENSG00000102575	mtACP	34.86	36.257	32.94	34.6352	34.7213	34.3045	1.13662	3.32817	3.27314	15.519	17.5119	14.9246	34.6857	34.5537	2.57931	15.9852	1	0.996194	0.0743623	0.460858	0.048013	0.00634267	0.0360296	0.0390707
ENSG00000163114	PDH E1	35.8022	37.0811	38.5639	35.201	36.7145	34.3616	26.4911	24.4065	21.821	27.2788	30.0477	32.0099	37.149	35.4257	24.2395	29.7788	1	0.95361	0.652494	0.801603	0.0372053	0.0320987	0.0629774	0.063985
ENSG00000119689	KGDH E2	1884.32	1921.62	1969.97	1890.55	1934.5	1899.94	1040.05	1063.9	1049.96	1327.42	1345.89	1314.87	1925.31	1908.33	1051.31	1329.39	1	0.991184	0.546046	0.690483	0.0223049	0.0120223	0.00622452	0.0081039
ENSG00000142168	SOD1	1529.13	1446.16	1491.14	1563.44	1474.7	1468.33	878.604	881.964	895.751	1359.88	1352.15	1373.96	1488.81	1502.16	885.439	1361.99	1	1.00896	0.59473	0.914821	0.0278966	0.0357117	0.00610302	0.00742995
ENSG00000167468	SOD2	171708	168743	167261	172361	171981	169557	2122.06	2098.96	2143.91	9873.46	10147.3	9808.57	169237	171300	2121.64	9943.12	1	1.01219	0.0125365	0.0587525	0.013379	0.00898896	0.000132809	0.0010625
ENSG00000105835	GPX4	3993.82	4080.56	4098.22	3870.39	3907.47	3952.42	1777.67	1749.51	1755.5	2171.17	2213.51	2278.86	4057.54	3910.09	1760.89	2221.18	1	0.963662	0.43398	0.547421	0.0137714	0.010124	0.00365626	0.0133709
	C
	C+
	P1
	P1+
